# Supplementary material for: Type 2 innate lymphoid cells are protective against hepatic ischaemia/reperfusion injury
Source: PubMed Central journal article supplement — JHEP Rep. 2023 Jul 3;5(10):100837. doi: 10.1016/j.jhepr.2023.100837 (PMC10482753; doi:10.1016/j.jhepr.2023.100837), 2023-07-03
Supplement: mmc1.pdf [file mmc1.pdf]

## Supplementary materials

# **Type 2 innate lymphoid cells are protective against hepatic ischemia reperfusion injury**

Qi Cao, Ruifeng Wang, Zhiguo Niu, Titi Chen, Farhana Azmi, Scott A. Read, Jianwei  
Chen, Vincent W.S. Lee, Chunze Zhou, Sohel Julovi, Qingsong Huang, Yuan Min  
Wang<sup>5</sup>, Malcolm R. Starkey, Guoping Zheng, Stephen I. Alexander, Jacob George,  
Yiping Wang, David C.H. Harris

## **Table of content**

|                            |    |
|----------------------------|----|
| Supplementary figures..... | 2  |
| Table S1.....              | 13 |

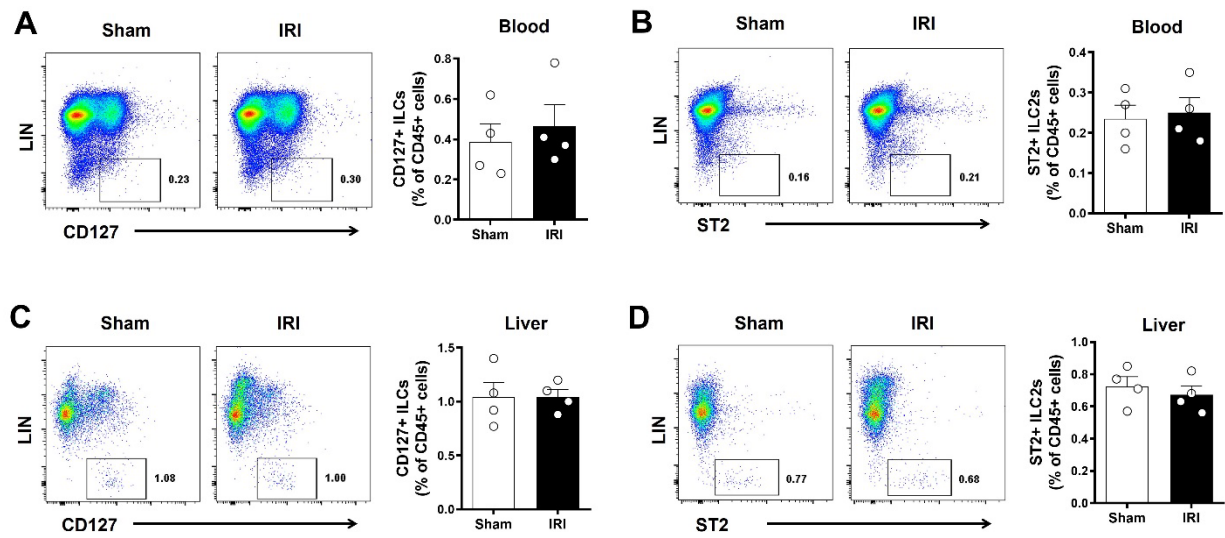

**Fig. S1. ILC2 population did not increase in peripheral blood and liver tissue after hepatic IRI.** (A, B) Proportion of CD127+ ILCs and ST2+ ILC2s in CD45+ leukocytes in peripheral blood of Sham and IRI mice. (C, D) Proportion of CD127+ ILCs and ST2+ ILC2s in CD45+ leukocytes in the livers of Sham and IRI mice. Data shown are the mean  $\pm$  SEM (n=4 per group). Statistical significance was assessed using the Student t test.

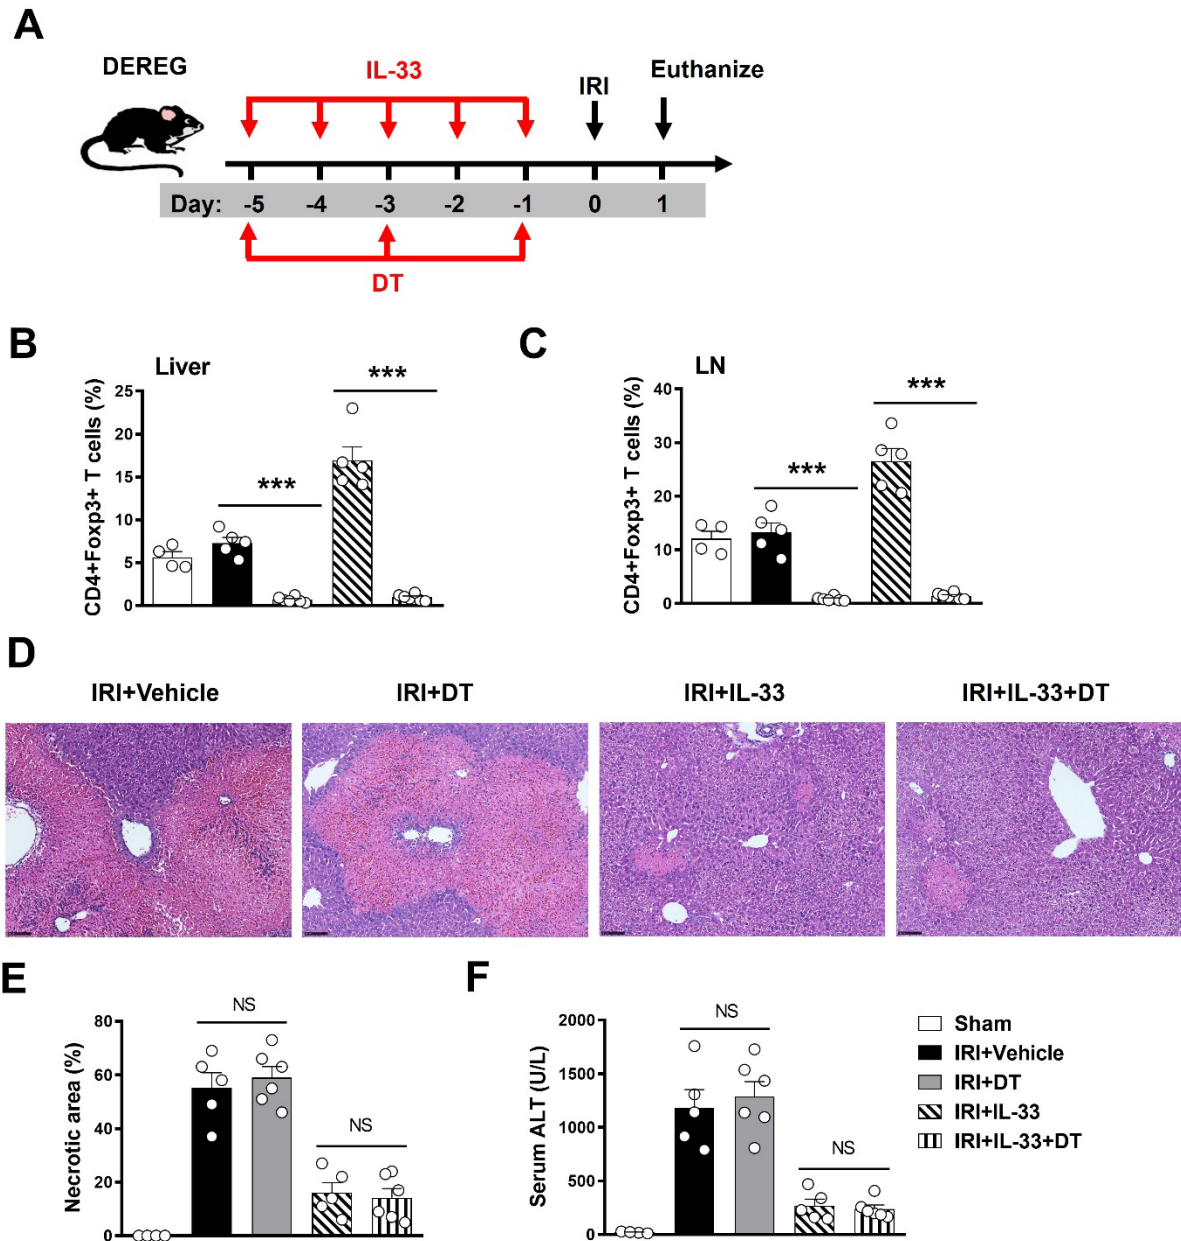

**Fig. S2. Tregs did not contribute to IL-33-mediated hepatoprotection in IRI mice.**

(A) DEREK C57BL/6 mice were treated with mouse recombinant IL-33 daily for 5 consecutive days, as well as DT at day -5, -3 and -1 before hepatic ischemia. (B, C) Proportion of CD4+Foxp3+ Tregs in the CD4+ T cell compartment from the livers and lymph nodes of Sham, IRI+Vehicle, IRI+DT, IRI+IL-33 or IRI+IL-33+DT mice. (D) Representative H&E-stained sections of livers from mice at one day after IRI. Bar = 200  $\mu$ m. (E, F) Liver necrosis areas and serum ALT levels were assessed in these mice. Data shown are the mean  $\pm$  SEM (n=4-6 per group); Statistical significance was assessed using a one-way ANOVA. NS: non significant, \*\*\*P<0.001.

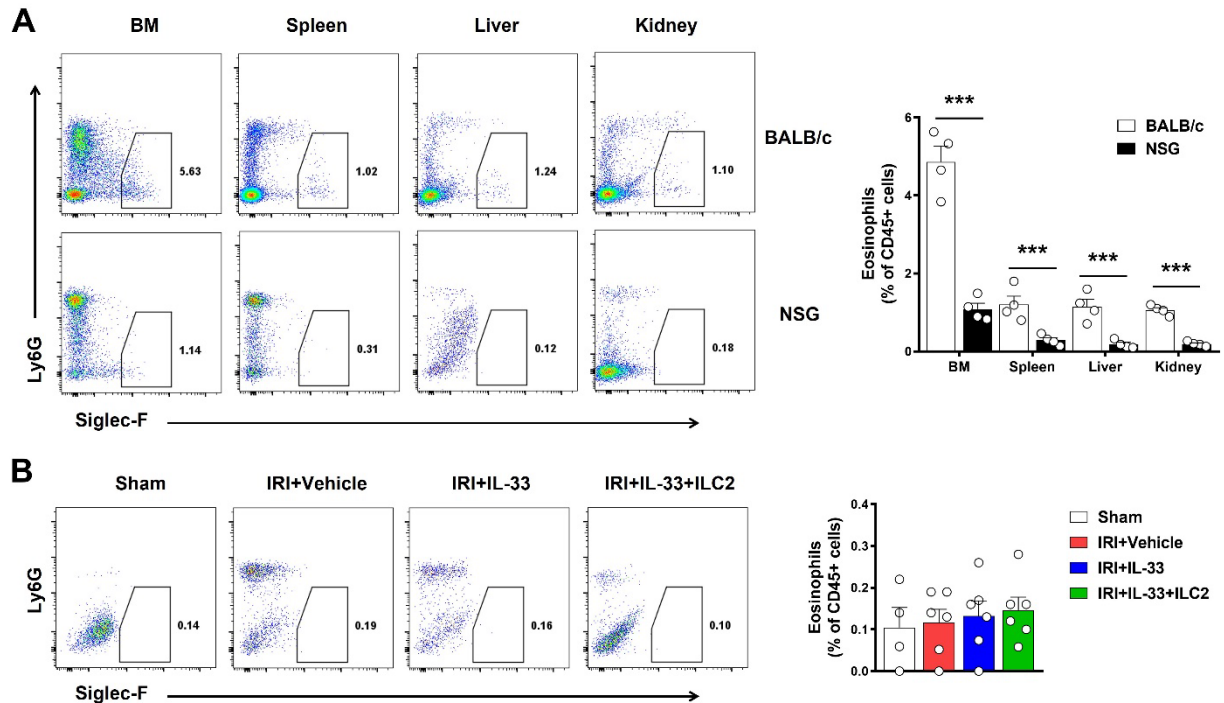

**Fig. S3. There was no increase of eosinophils in livers of NSG mice treated with IL-33.**

(A) Flow cytometric analysis of Siglec-F<sup>+</sup> eosinophils in bone marrow (BM), spleen, liver and kidney of normal BALB/c and NSG mice. Data shown are the mean  $\pm$  SEM (n=4 per group); Statistical significance was assessed using the Student t test. \*\*\*P<0.001. (B) NSG mice were administered mouse recombinant IL-33 daily for 5 consecutive days and were injected with ILC2s at day -5 before ischemia. Frequency of Siglec-F<sup>+</sup> eosinophils in the CD45<sup>+</sup> leukocyte compartment from the liver was assessed in Sham, IRI+Vehicle, IRI+IL-33 or IRI+IL-33+ILC2 mice. Data shown are the mean  $\pm$  SEM (n=4-6 per group), Statistical significance was assessed using a one-way ANOVA.

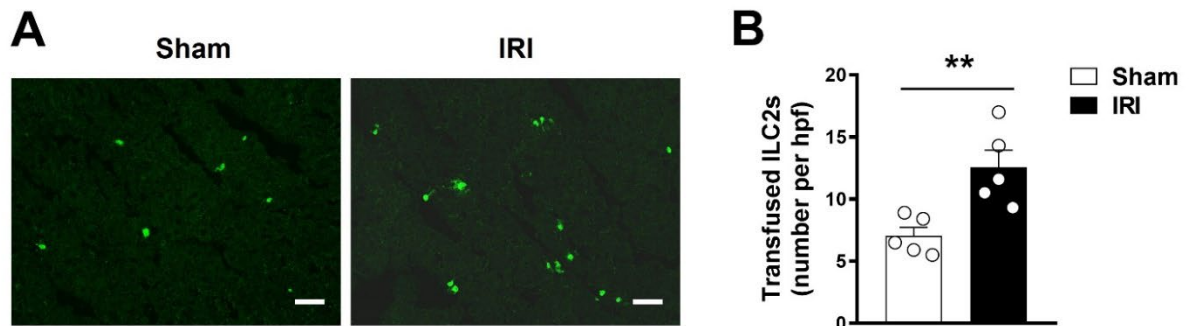

**Fig. S4. Transfused mouse ILC2s distributed into liver.**

CFSE labeled ILC2 cells were adoptively transferred into C57BL/6 mice one day before ischemia. (A) Transfused CFSE+ ILC2s were observed in Sham liver and IRI liver at 4 hours after IRI. Bar = 100  $\mu$ m. (B) Numbers of CFSE labeled ILC2 cells in Sham liver and IRI liver were counted. Data shown are the mean  $\pm$  SEM per high power field (hpf) from each group (n=5 per group). Statistical significance was assessed using the Student t test. \*\*P<0.01.

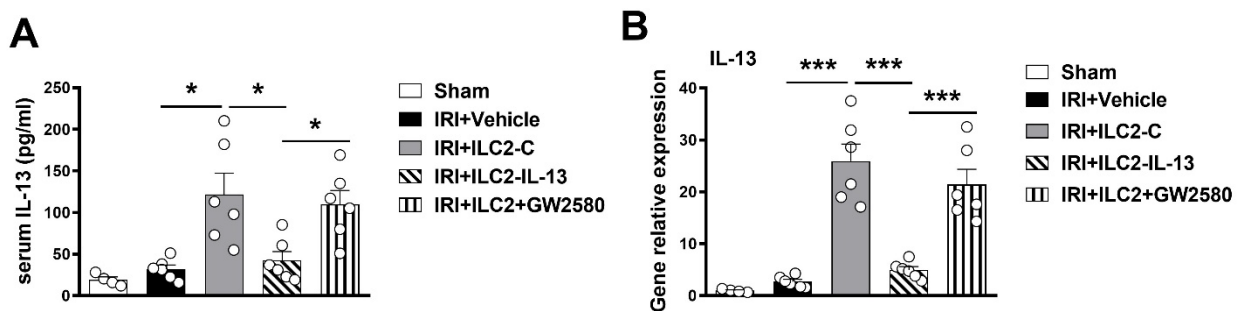

**Fig. S5. IL-13 was increased in peripheral blood and liver of IRI mice treated with ILC2s.** C57BL/6 mice were treated with transfected ILC2 one day before ischemia, and GW2580 daily for 3 consecutive days before ischemia. IL-13 in the serum (A) and its mRNA expression in the livers (B) from these mice were measured at one day after IRI. Data shown are the mean  $\pm$  SEM (n=4-6 per group). Statistical significance was assessed using a one-way ANOVA. \*P<0.05, \*\*\*P<0.001.

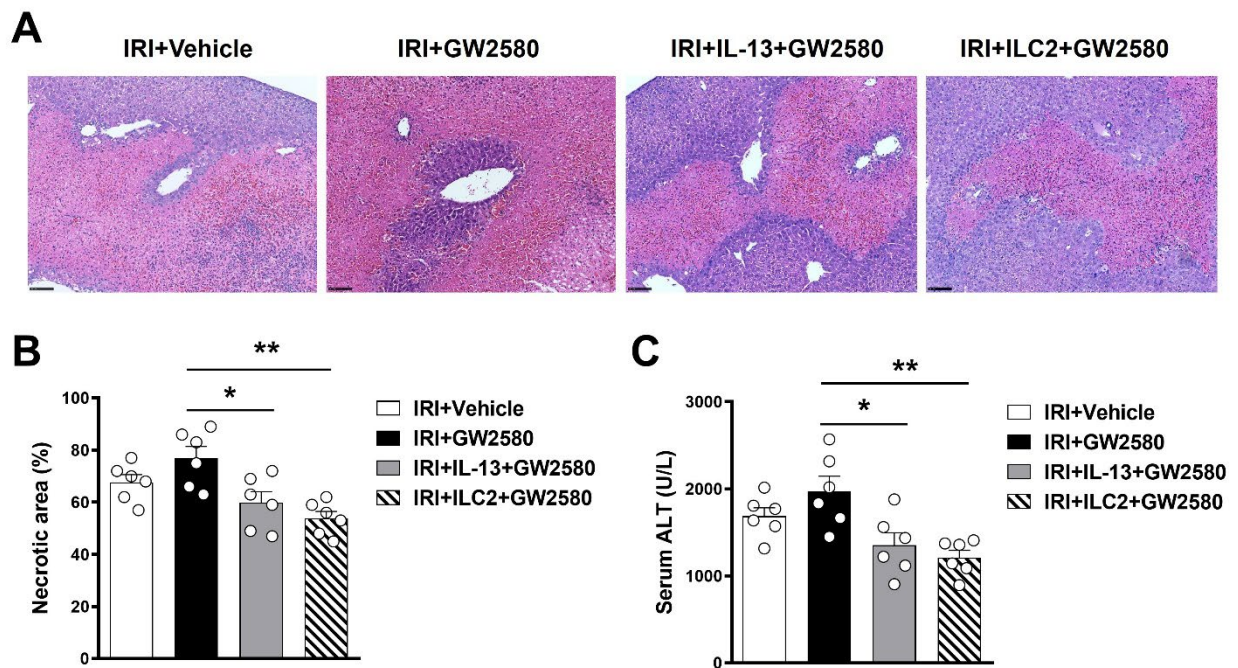

**Fig. S6. Macrophages were required for ILC2-mediated hepatoprotection in IRI mice.** C57BL/6 mice were treated with ILC2s or IL-13 one day before ischemia, and GW2580 daily for 3 consecutive days before ischemia. (A) Representative H&E-stained sections of livers from mice at one day after IRI. Bar = 200  $\mu$ m. (B and C) Liver necrosis areas and serum ALT levels were assessed in these mice. Data shown are the mean  $\pm$  SEM (n=6 per group). Statistical significance was assessed using a one-way ANOVA. \*P<0.05, \*\*P<0.01.

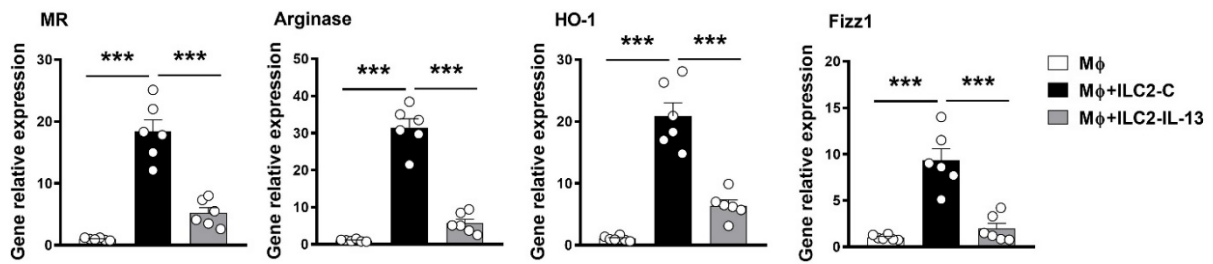

**Fig. S7. ILC2 induced M2 macrophage through IL-13 production.**

Liver macrophages were cultured with transfected ILC2-C or ILC2-IL-13 for 6 hours. Macrophage phenotype was examined by qPCR. The mRNA expression of M2 macrophage markers (MR, arginase, HO-1 and FIZZ1) was examined by qPCR in liver macrophages. Data shown are the mean  $\pm$  SEM (n=6 per group). Statistical significance was assessed using a one-way ANOVA. \*\*\*P<0.001.

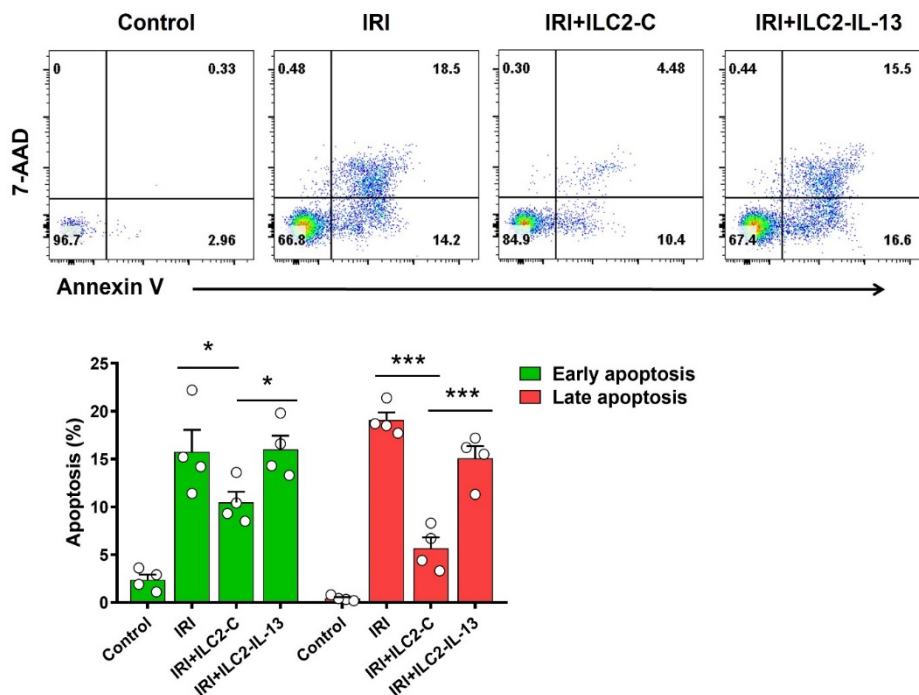

**Fig. S8. ILC2s protected against ischemic hepatocyte injury through IL-13 production.**

Transfected ILC2 cells (ILC2-C or ILC2-IL-13) were cocultured with ischemic hepatocytes for 12 hours. Hepatocytes were exposed to DMEM/F12 medium alone as the nonischemic control. Frequency of early apoptosis (Annexin-V+7AAD<sup>-</sup> cells) and late apoptosis (Annexin-V+7AAD<sup>+</sup> cells) in hepatocytes were assessed by flow cytometry. Data shown are

the mean  $\pm$  SEM (n=4 per group). Statistical significance was assessed using a one-way ANOVA. \*P<0.05, \*\*\*P<0.001.

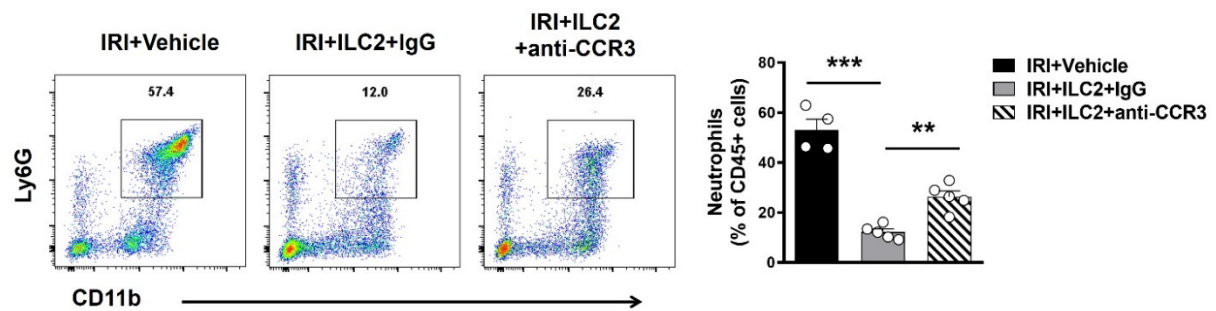

**Fig. S9. Eosinophil depletion resulted in an infiltration of neutrophils to the liver.**

The infiltration of neutrophils in livers of IRI+Vehicle, IRI+ILC2+IgG or IRI+ILC2+anti-CCR3 mice was assessed by flow cytometry. Data shown are the mean  $\pm$  SEM (n=4-5 per group). Statistical significance was assessed using a one-way ANOVA. \*\*P<0.01, \*\*\*P<0.001.



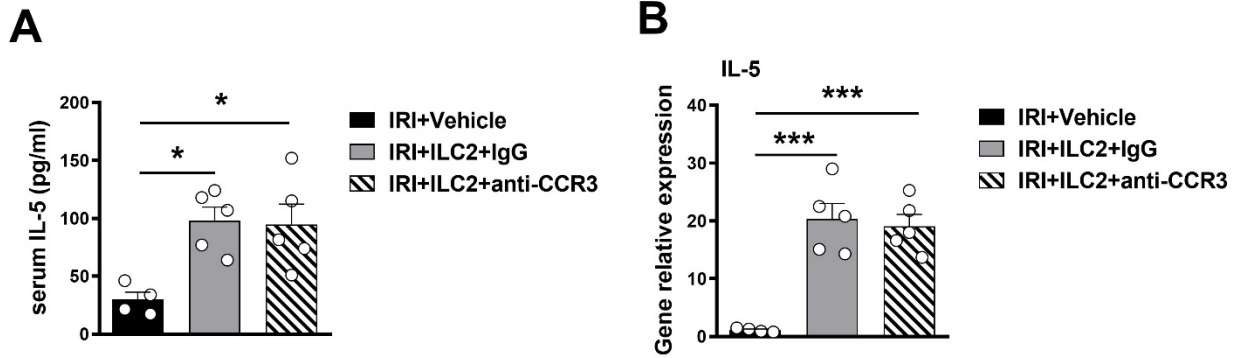

**Fig. S10. IL-5 was increased in peripheral blood and liver of IRI mice treated with ILC2s.** C57BL/6 mice were treated with ILC2 one day before ischemia, and anti-CCR3 antibody daily for 2 consecutive days before ischemia. IL-5 in the serum (A) and its mRNA expression in the livers (B) from these mice were measured at one day after IRI. Data shown are the mean  $\pm$  SEM (n=4-5 per group). Statistical significance was assessed using a one-way ANOVA. \*P<0.05, \*\*\*P<0.001.

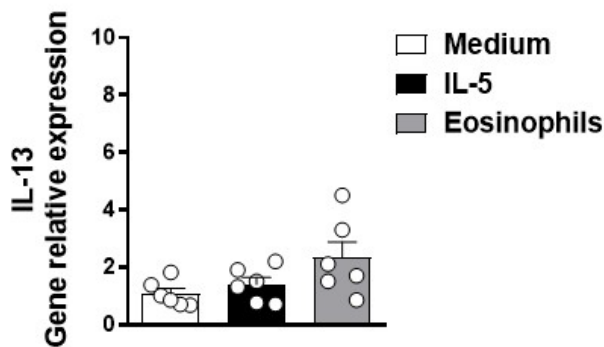

**Fig. S11. IL-13 expression was not increased in ILC2s cultured with IL-5 or eosinophils.** ILC2s were cultured with IL-5 or eosinophils for 24 hours. The expression of IL-13 in ILC2s was measured by qPCR. Data shown are the mean  $\pm$  SEM (n=6 per group). Statistical significance was assessed using a one-way ANOVA.

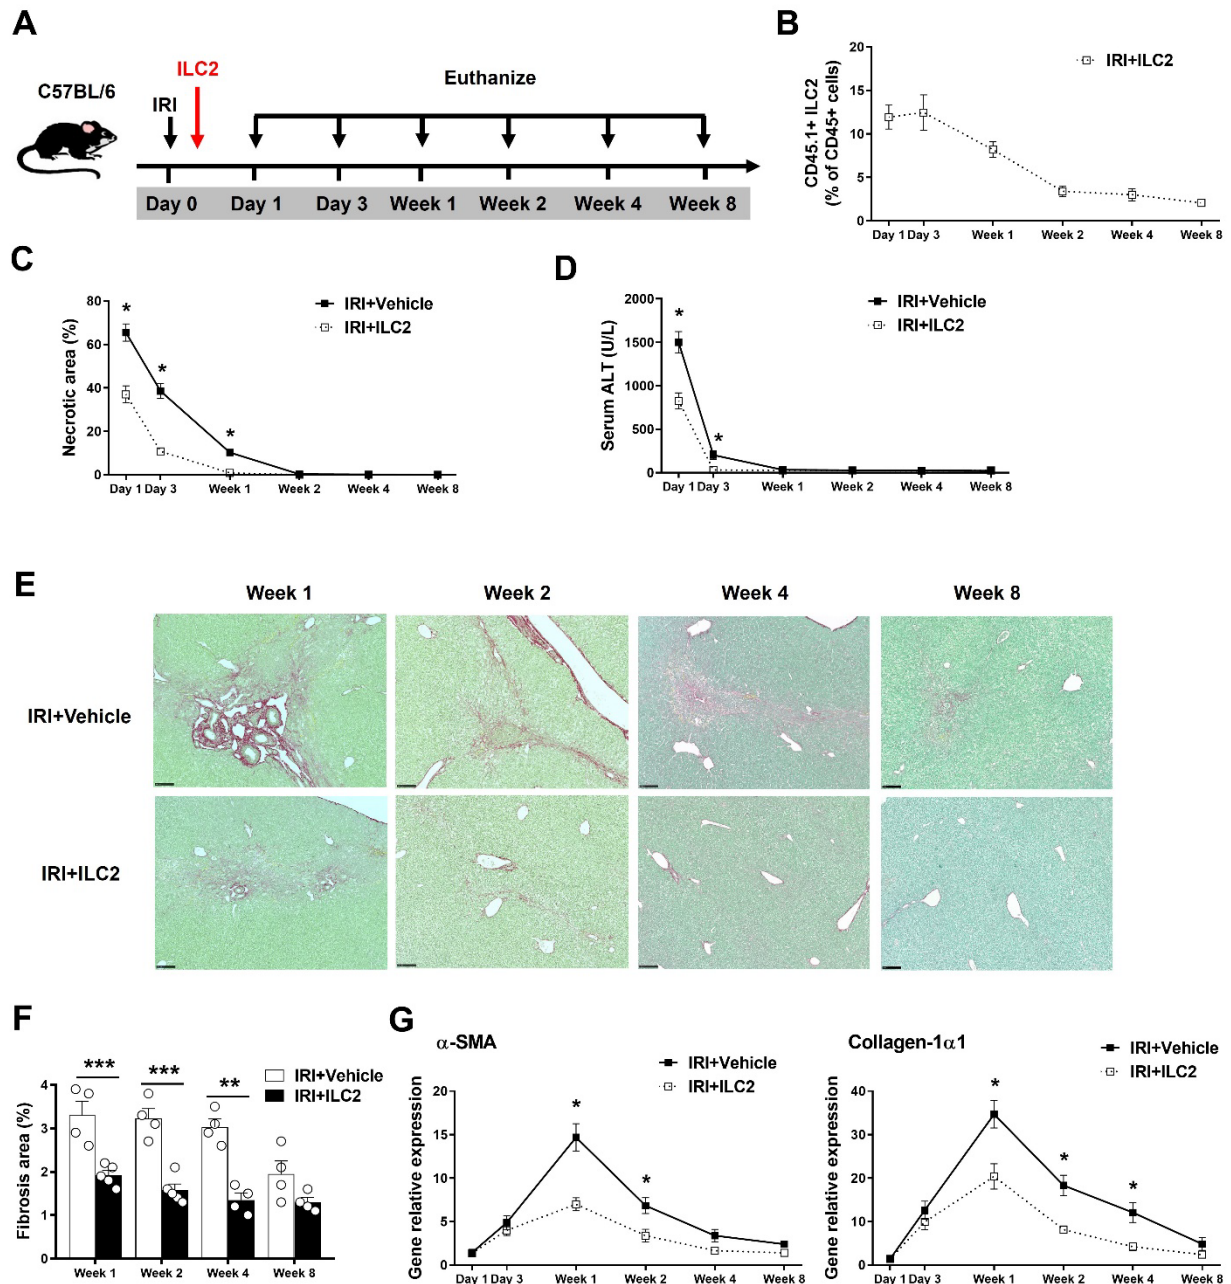

**Fig. S12. ILC2 were protective post-IRI.** (A) C57BL/6 mice were treated with ILC2s at 6 hours after ischemia. Mice were euthanized at indicated time points. (B) Percentage of CD45.1+ ILC2s in the CD45+ leukocyte compartment from the livers was measured at day 1, day 3, week 1, week 2, week 4 and week 8 after IRI. (C and D) Liver necrosis areas and serum ALT levels were assessed at indicated time points. (E) Liver fibrosis was determined by Sirius red staining. Bar = 200  $\mu$ m. (F) Liver mRNA expression of  $\alpha$ -smooth muscle actin ( $\alpha$ -SMA), collagen-1 $\alpha$ 1 after IRI was measured by qPCR. Data shown are the mean  $\pm$  SEM (n=4-5 per group). Statistical significance was assessed using the Student t test or ANOVA. \*P<0.05, \*\*P<0.01, \*\*\*P<0.001.

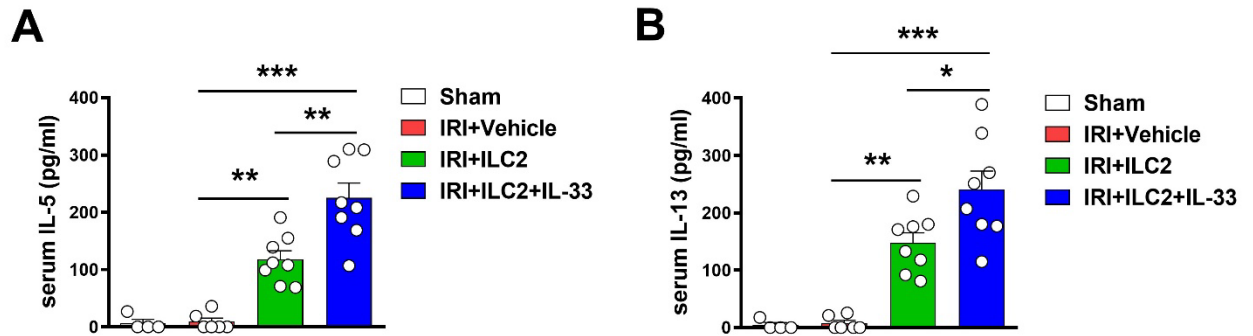

**Fig. S13. Human IL-5 and IL-13 were increased in peripheral blood of NSG mice treated with human ILC2s and IL-33.** NSG mice were treated with human ILC2 ( $5 \times 10^6$ ) one day before IRI or human ILC2s ( $0.5 \times 10^6$ ) at day -5 before ischemia followed by administration of human recombinant IL-33 daily for 5 consecutive days. (A and B) Human IL-5 and IL-13 levels in the serum from these mice. Data shown are the mean  $\pm$  SEM ( $n=4-8$  per group). Statistical significance was assessed using a one-way ANOVA. \* $P < 0.05$ , \*\* $P < 0.01$ , \*\*\* $P < 0.001$ .

**Table S1.** Real-time PCR primers

| <b>Gene</b>           | <b>Forward (5'-3')</b>  | <b>Reverse (5'-3')</b>   |
|-----------------------|-------------------------|--------------------------|
| IL-4                  | tcaacccccagctagttgtc    | tctgtggtgttcttcgttgc     |
| IL-5                  | aaagagaagtgtggcgaggag   | tcacatggagcagctcag       |
| IL-13                 | cagcatggtatggagtgtgg    | aggctggagaccgtagtgg      |
| Mannose receptor      | caaggaaggttggcatttgt    | ccttcagtcctttgcaagc      |
| Arginase              | agtctggcagttggaagcat    | ctggttgcaggggagtgtt      |
| HO-1                  | ggatgatggcttcctgtacc    | agtgaggccataaccagaag     |
| FIZZ1                 | tgctgggatgactgctactg    | ctgggttctccaccttca       |
| TNF- $\alpha$         | gctgagctcaaaccctggta    | cggactccgcaaagtctaag     |
| IL-1 $\beta$          | tgccacctttgacagtgatg    | atgtgctgctgcgagatttg     |
| IL-6                  | cacaagtcggagaggagac     | ttgccattgcacaactcttt     |
| MCP-1                 | agcaccagccaactctcact    | cgftaactgeatctggctga     |
| CXCL1                 | tggtgggattcacctcaagaaca | tgtggctatgacttcggtttgggt |
| $\alpha$ -SMA         | tgctgacagaggcaccactgaa  | cagttgtacgtccagaggcatag  |
| collagen-1 $\alpha$ 1 | cctcagggtattgctggacaac  | cagaaggaccttgtttgccagg   |
